# Supplementary material for: Cross-linked K0.5MnO2 nanoflower composites for high rate and low overpotential Li–CO2 batteries
Source: Royal Society of Chemistry journal article supplement (doi:10.1039/d4sc01799d), 2024-01-01
Supplement: d4sc01799d1.pdf [file d4sc01799d1.pdf]

## Supporting Information

### **Cross-linked $K_{0.5}MnO_2$ Nanoflower Composites for High Rate and Low Overpotential Li–CO<sub>2</sub> Batteries**

Jiawei Wu,<sup>a,c</sup> ‡ Jian Chen,<sup>b,‡</sup> Xiaoyang Chen,<sup>b</sup> Yang Liu,<sup>a,b</sup> \* Zhe Hu,<sup>d</sup> Feijian Lou,<sup>a,\*</sup> Shulei Chou<sup>e</sup> and Yun Qiao<sup>a,b\*</sup>

<sup>a</sup> School of Chemistry and Chemical Engineering, Henan Normal University, Xinxiang, Henan 453007, China. E-mail address: liuy986@htu.edu.cn; loufeijian@htu.edu.cn;

<sup>b</sup> School of Environment and Chemical Engineering, Shanghai University, Shanghai 200444, China. E-mail address: yunqiao@shu.edu.cn

<sup>c</sup> Sinopec Petroleum Engineering Zhongyuan Co. Ltd., Natural Gas Technology Center, Zhengzhou, Henan 450000, China

<sup>d</sup> College of Materials Science and Engineering, Shenzhen University, Shenzhen 518055, China

<sup>e</sup> Institute for Carbon Neutralization, College of Chemistry and Materials Engineering, Wenzhou University, Wenzhou, Zhejiang 325035, China.

‡ J. Wu and J. Chen. contributed equally to this work.

## Experimental

### *Materials*

Potassium permanganate ( $\text{KMnO}_4$ ), lithium bis(trifluoromethane sulfonimide) (LiTFSI), tetraethylene glycol dimethyl ether (TEGDME) and N-methyl-2-pyrrolidone (NMP) were purchased from Aladdin Ltd. Sulfuric acid ( $\text{H}_2\text{SO}_4$ , 98%), nitric acid ( $\text{HNO}_3$ , 60%) were purchased from Guoyao Chemical Reagent Co., Ltd. multi-wall carbon nanotubes (CNT) were brought from XFNANO Co., Ltd.

### *Preparation of $\text{K}_{0.5}\text{MnO}_2/\text{CNT}$ .*

First, CNT were functionalized via acid treatment to enhance their hydrophilicity. The CNT were treated at 80 °C for 8 h in a mixed acid solution of  $\text{H}_2\text{SO}_4$  and  $\text{HNO}_3$  with the volume ratio of 3:1. Thereafter, 20 mg of the functionalized CNT were dispersed into 8 mmol  $\text{L}^{-1}$  potassium permanganate solution, ultrasonicated and stirred for 1 h. And then, the mixed solution was transferred into a 100 mL polytetrafluoroethylene stainless steel autoclave and kept at 140 °C for 2 h. At last, the product was washed several times with deionized water and ethanol and dried under vacuum at 60 °C, the as-obtained sample was labeled as  $\text{K}_{0.5}\text{MnO}_2/\text{CNT}$  composite.

### *Materials Characterization.*

The morphology and the energy-dispersive X-ray spectroscopy (EDS) spectrum of the samples were characterized by scanning electron microscopy (FE-SEM) (Hitachi SU8010). TEM and high-resolution transmission electron microscopy (HRTEM) were recorded on a JEM-ARM300F. The high-angle-annular dark-field scanning transmission electron microscopy (HAADF-STEM) and the corresponding EDS elemental mapping were performed on FEI Themis Z. X-ray diffraction (XRD) patterns were measured on a X' Pert3 Powder diffractometer with  $\text{Cu K}\alpha$  radiation ( $\lambda=1.54 \text{ \AA}$ ). Inductively coupled plasma (ICP) analysis was carried out by using Prodigy 7. X-ray photoelectron spectroscopy (XPS) was conducted on an ESCALAB 250Xi X-ray Photoelectron Spectrometer. Raman spectra were taken on a Horiba LabRAM HR Evolution using a 532 nm laser.

### *Battery Assemble and Electrochemical Tests.*

First, for the cathode preparation, 90 wt%  $\text{K}_{0.5}\text{MnO}_2/\text{CNT}$  and 10 wt%

polyvinylidene fluoride (PVDF) were dispersed in the NMP solution. Then, the slurry was uniformly coated on carbon paper and dried under vacuum at 80 °C overnight. The Li–CO<sub>2</sub> batteries were assembled in a glove box filled with pure argon. The K<sub>0.5</sub>MnO<sub>2</sub>/CNT cathode and the lithium anode were separated by a glass fiber separator impregnated with 50 μL electrolyte (1.0 M LiTFSI/TEGDME), and sealed into a CR2032-type coin cell. Then, the battery was transferred into a glove box filled with pure CO<sub>2</sub>. Finally, the galvanostatic discharge/charge measurements were performed on the LAND-CTA2001A test system. The cyclic voltammetry curves were obtained on the CHI760E electrochemical workstation.

*Theoretical calculation.*

DFT calculations were conducted using Vienna ab initio Simulation Package (VASP).<sup>1,2</sup> The projector-augmented wave method was used for the electron–ion interactions with a cut-off energy of 520 eV.<sup>3</sup> Generalized gradient approximation with the Perdew–Burke–Ernzerhof function was used to approximate exchange correlation energy.<sup>4</sup> The k-point grid was set as 3 × 3 × 1. Atomic positions and cell vectors were fully optimized until all force components were less than 0.02 eV Å<sup>-1</sup>.

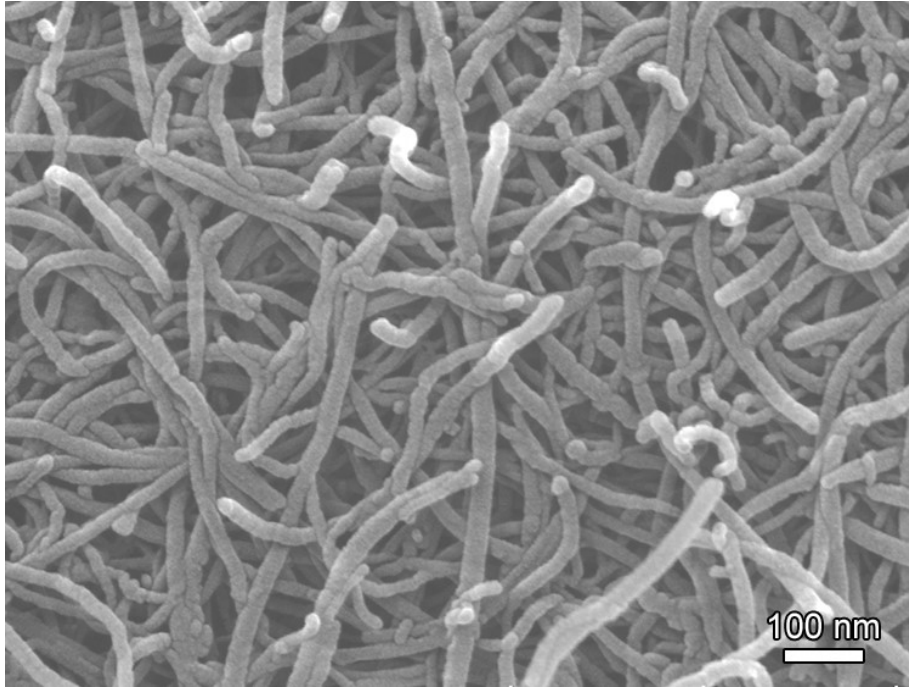

**Fig. S1.** SEM image of the pristine CNT.

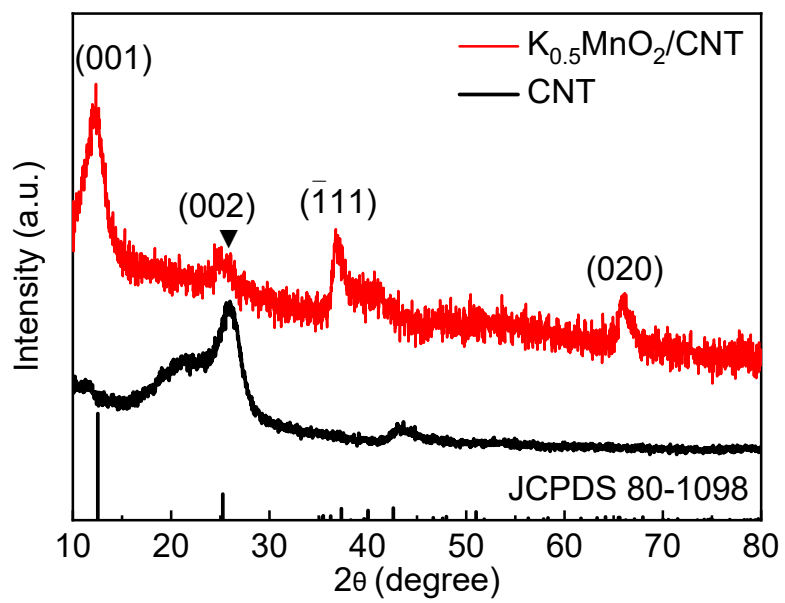

**Fig. S2.** (a) XRD patterns of the  $K_{0.5}MnO_2/CNT$  and pure CNT.

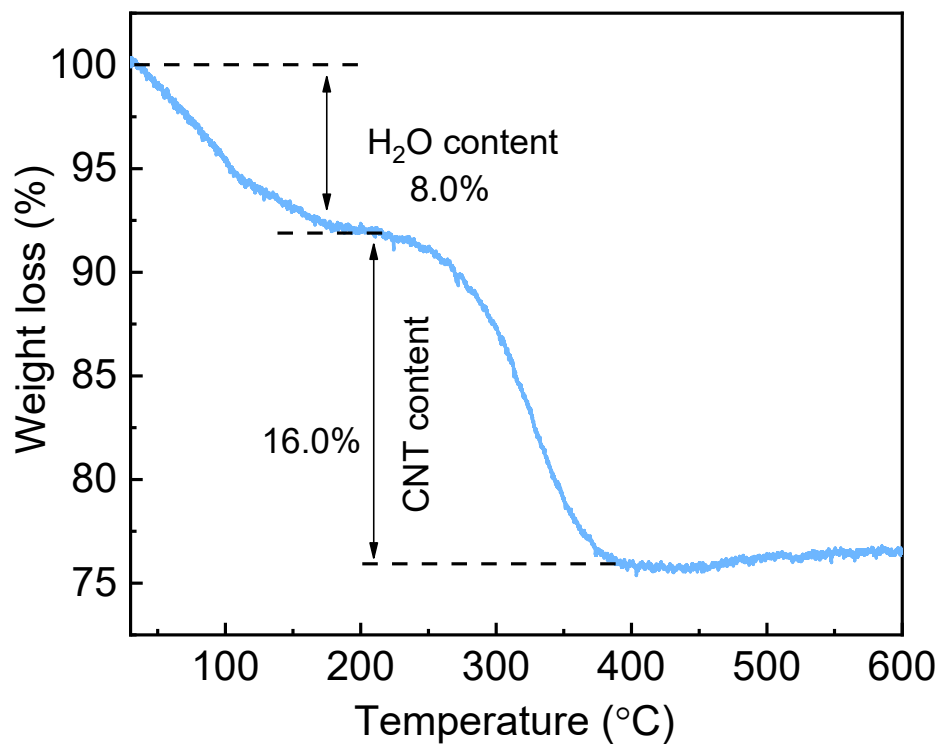

**Fig. S3.** Thermogravimetric analysis for the proportion of CNT in the  $K_{0.5}MnO_2/CNT$  composite.

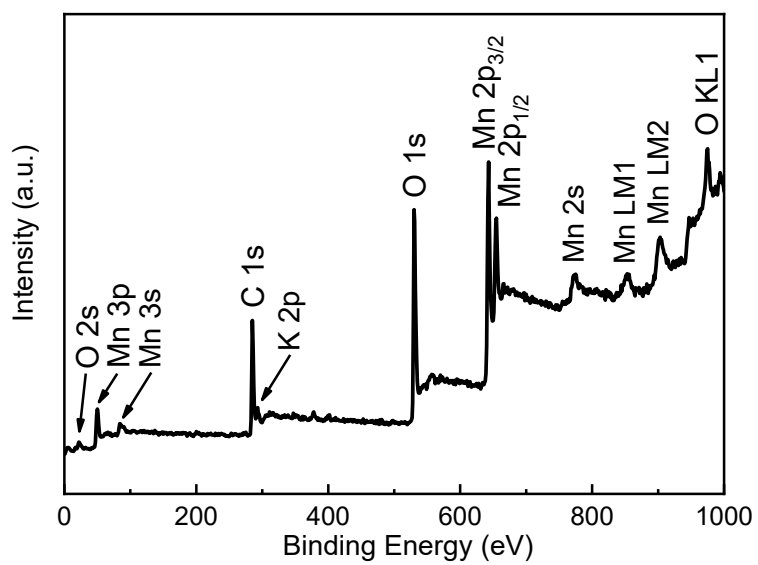

**Fig. S4.** The XPS survey spectrum of  $K_{0.5}MnO_2/CNT$ .

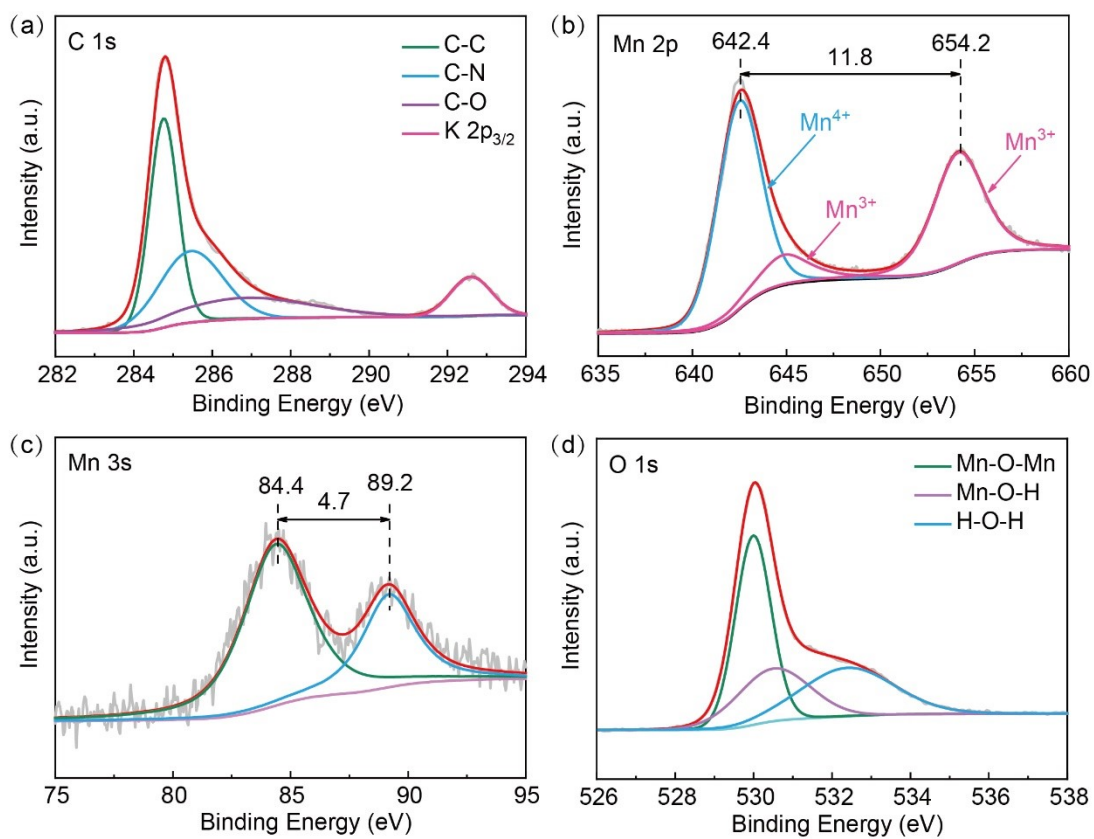

**Fig. S5.** High-resolution XPS spectra of (a) C 1s, (b) Mn 2p, (c) Mn 3s and (d) O 1s for the  $K_{0.5}MnO_2/CNT$  sample.



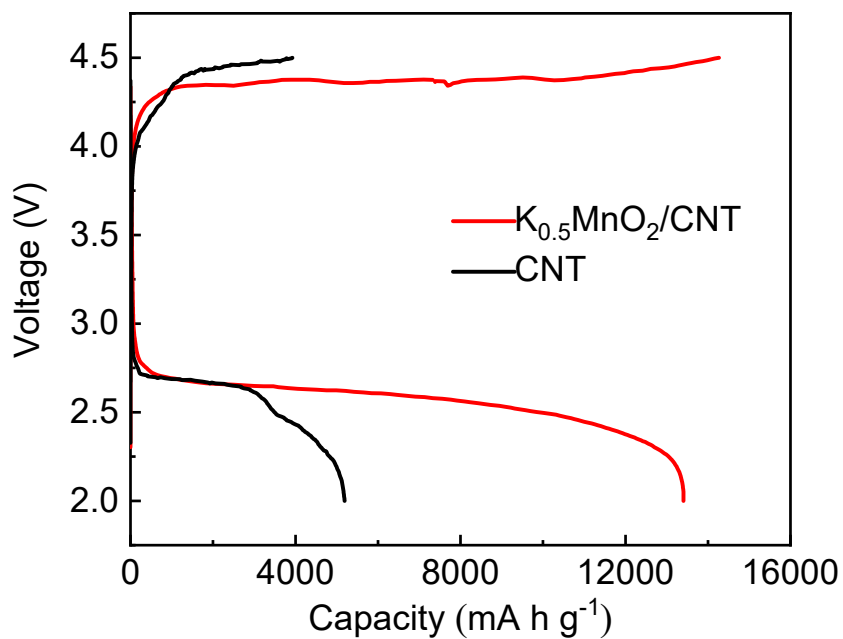

**Fig. S6.** Discharge/charge curves of Li-CO<sub>2</sub> battery based on K<sub>0.5</sub>MnO<sub>2</sub>/CNT and CNT cathodes at 100 mA g<sup>-1</sup>.

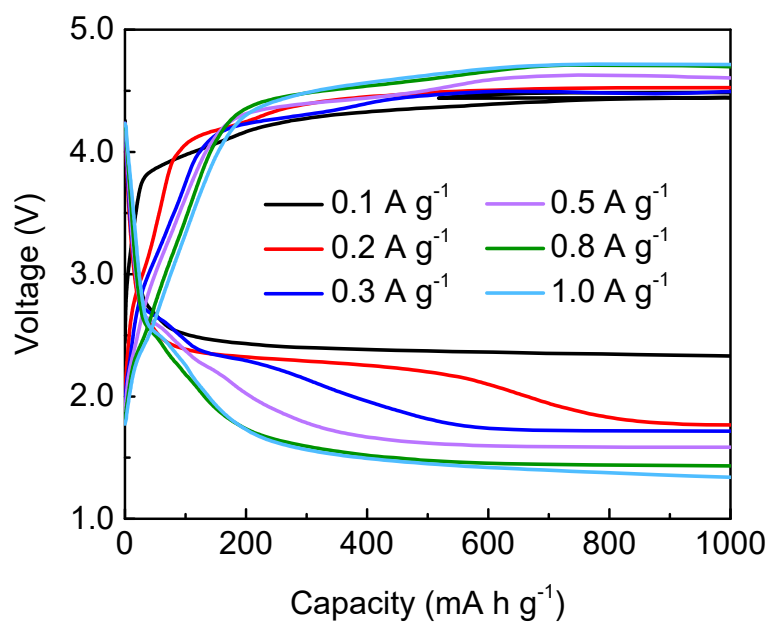

**Fig. S7.** The charge/discharge profiles of the CNT electrode at various current densities.

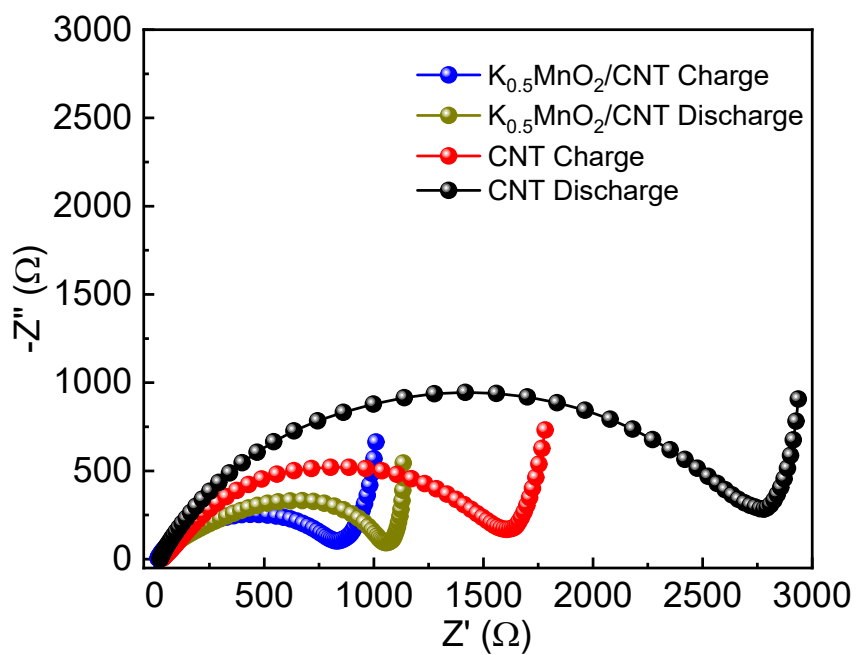

**Fig. S8.** EIS spectra for K<sub>0.5</sub>MnO<sub>2</sub>/CNT and CNT cathodes after the first discharge and charge processes.

**Table S1.** The element content of K and Mn in the  $K_{0.5}MnO_2/CNT$  from ICP results.

| Elements | K (wt%) | Mn (wt%) |
|----------|---------|----------|
| Content  | 15.15   | 40.95    |

**Table S2.** The electrochemical performance summary and comparison of various Li-CO<sub>2</sub> batteries.

| Cathode catalyst                       | Electrolyte           | Cycle                        |                                                                  | Cycle number | Capacity (mA h g <sup>-1</sup> ) | Energy efficiency (%) | Reference                  |
|----------------------------------------|-----------------------|------------------------------|------------------------------------------------------------------|--------------|----------------------------------|-----------------------|----------------------------|
|                                        |                       | Discharge/Charge plateau (V) | Capacity/Current (mA h g <sup>-1</sup> /(n mA g <sup>-1</sup> )) |              |                                  |                       |                            |
| K <sub>0.5</sub> MnO <sub>2</sub> /CNT | LiTFSI in TEGDME      | 2.86/3.91                    | 1000/100                                                         | 100          | 14267                            | 87.95                 | this work                  |
| CNT                                    | LiTFSI in TEGDME      | 2.7/4.3                      | 1000/50                                                          | 29           | 8379                             | 63.5                  | Zhang et al. <sup>5</sup>  |
| Graphene                               | LiTFSI in TEGDME      | 2.75/4.2                     | 1000/100                                                         | 10           | 14722                            | N/A                   | Zhang et al. <sup>6</sup>  |
| BN-hG                                  | LiTFSI in TEGDME      | 2.92/4.0                     | 1000/100                                                         | 200          | 16033                            | N/A                   | Qie et al. <sup>7</sup>    |
| Ni/NG                                  | LiTFSI in TEGDME      | 2.5<V<4.2                    | 1000/100                                                         | 101          | 17625                            | 67.5                  | Zhang et al. <sup>8</sup>  |
| Cu/NG                                  | LiTFSI in TEGDME      | 2.85/3.62                    | 1000/200                                                         | 50           | 13590                            | N/A                   | Zhang et al. <sup>9</sup>  |
| Ni/r-GO                                | LiTFSI in TEGDME      | 2.7/4.0                      | 1000/100                                                         | 100          | 14.6 mA h cm <sup>-2</sup>       | N/A                   | Qiao et al. <sup>10</sup>  |
| Ir/CNFs                                | LiTFSI in TEGDME      | 2.76/4.14                    | 1000/50                                                          | 45           | 21528                            | N/A                   | Wang et al. <sup>11</sup>  |
| Ir/N-CNFs                              | LiTFSI in TEGDME      | 2.75/3.8                     | 1000/500                                                         | 400          | 7667                             | N/A                   | Xing et al. <sup>12</sup>  |
| NiO/CNT                                | LiTFSI in TEGDME      | 2.7/4.1                      | 1000/50                                                          | 42           | 9000                             | 66                    | Zhang et al. <sup>13</sup> |
| P-Mn <sub>2</sub> O <sub>3</sub> /KB   | LiClO <sub>4</sub> in | 2.5/4.3                      | 1000/50                                                          | 45           | 9434                             | N/A                   | Ma et al. <sup>14</sup>    |

|                                  |                                                  |           |                                              |      |        |         |                            |  |
|----------------------------------|--------------------------------------------------|-----------|----------------------------------------------|------|--------|---------|----------------------------|--|
|                                  | TEGDME                                           |           |                                              |      |        |         |                            |  |
| Mn-MOF                           | LiTFSI in<br>TEGDME                              | 2.6/4.46  | 1000/200                                     | 50   | 18022  | N/A     | Li et al. <sup>15</sup>    |  |
| Mo <sub>2</sub> C/CNT            | LiCF <sub>3</sub> SO <sub>3</sub> in<br>TEGDME   | 2.5/3.45  | 100 $\mu$ Ah<br>cm <sup>-2</sup> /20 $\mu$ A | 40   | 287.5  | 77      | Hou et al. <sup>16</sup>   |  |
| CQD/hg                           | LiTFSI in<br>DMSO with<br>0.3M LiNO <sub>3</sub> | 3.0/4.0   | 500/1000                                     | 235  | 12300  | 74.3    | Jin et al. <sup>17</sup>   |  |
| Ru/Ni foam                       | LiTFSI in<br>TEGDME                              | 2.8/4.0   | 1000/200                                     | 100  | 9502   | N/A     | Zhao et al. <sup>18</sup>  |  |
| Ru/N-doped<br>CNT                | LiTFSI in<br>TEGDME                              | 2.35/4.1  | 500/100                                      | 150  | 9300   | N/A     | Zhang et al. <sup>19</sup> |  |
| Ru/ACNF                          | LiTFSI in<br>TEGDME                              | 2.8/4.15  | 1000/100                                     | 50   | 11495  | N/A     | Qiao et al. <sup>20</sup>  |  |
| RuP <sub>2</sub> /NPCF           | LiTFSI in<br>TEGDME                              | 2.7/4.0   | 1000/200                                     | 200  | 11951  | N/A     | Guo et al. <sup>21</sup>   |  |
|                                  |                                                  |           | 500/50                                       | 55   |        |         |                            |  |
| CNT@RuO <sub>2</sub>             | LiTFSI in<br>TEGDME                              | 2.46/3.97 | 500/100                                      | 30   | 2187   | N/A     | Bie et al. <sup>22</sup>   |  |
|                                  |                                                  |           | 500/150                                      | 20   |        |         |                            |  |
| RuO <sub>2</sub> /LDO/Ni<br>foam | LiTFSI in<br>TEGDME                              | 2.52/3.25 | 1000/166                                     | 60   | 5455   | N/A     | Xu et al. <sup>23</sup>    |  |
| ZnS QDs/N-<br>rGO                | LiTFSI in<br>TEGDME                              | 2.75/4.13 | 1000/400                                     | 190  | 10310  | N/A     | Wang et al. <sup>24</sup>  |  |
| N-CNTs@Ti                        | LiTFSI in<br>TEGDME                              | 2.73/4.24 | 1000/250                                     | 45   | 9292.3 | 65      | Li et al. <sup>25</sup>    |  |
| Pt-based LCB                     | LiTFSI in<br>TEGDME                              | 2.56/2.91 | 1000/100                                     | 100  | 41470  | 89.5    | Wang et al. <sup>26</sup>  |  |
| Porous Pt @                      | LiTFSI in                                        | 2.55/3.0  | 100 $\mu$ Ah                                 | >200 | 5.81   | mAh87.6 | Chen et al. <sup>27</sup>  |  |

|                                           |                                                |           |                                                   |      |                                  |       |                           |
|-------------------------------------------|------------------------------------------------|-----------|---------------------------------------------------|------|----------------------------------|-------|---------------------------|
| carbon cloth                              | TEGDME                                         |           | $\text{cm}^2/20\mu\text{A}$                       |      | $\text{cm}^2$                    |       |                           |
| IrRu/N-CNT                                | LiTFSI in<br>TEGDME                            | 2.6/ 3.8  | 500/100                                           | 600  | 6628                             | 68.4* | Wang et al. <sup>28</sup> |
| Cd SAs/NC                                 | LiTFSI in<br>DMSO+0.3 M<br>LiNO <sub>3</sub>   | 2.91/4.22 | 500/1000                                          | 1685 | 160045                           | 70.4* | Zhu et al. <sup>29</sup>  |
| SnCu <sub>1.5</sub> O <sub>3.5</sub> @MFI | LiTFSI in<br>TEGDME                            | 2.34/4.02 | 1000/100                                          | 100  | 23000                            | 58.2* | Zhu et al. <sup>30</sup>  |
| TiVC/rGO<br>aerogels                      | LiCF <sub>3</sub> SO <sub>3</sub> in<br>TEGDME | 2.77/4.18 | 1000/20                                           | 91   | 27880                            | 66.3* | Zhao et al. <sup>31</sup> |
| MOC@NCNF                                  | N/A                                            | 2.58/4.03 | 100 $\mu\text{Ah}$<br>$\text{cm}^2/20\mu\text{A}$ | 171  | 10.31 mAh<br>$\text{cm}^2$       | 64.94 | Liu et al. <sup>32</sup>  |
| S <sub>V</sub> -CoS                       | LiTFSI in<br>TEGDME                            | 3.07/3.5* | 100 $\mu\text{Ah}$<br>$\text{cm}^2/20\mu\text{A}$ | 40   | 7790.6<br>$\mu\text{Ah cm}^{-2}$ | 89.1  | Mao et al. <sup>33</sup>  |

Note: \* denotes the energy efficiency value calculated from performance data reported in the literature.

## REFERENCES

- [1] Kresse, G.; Hafner, J. *Phys. Rev. B* **1994**, *49*, 14251–14269.
- [2] Kresse, G.; Furthmüller, J. *Comput. Mater. Sci.* **1996**, *6*, 15–50.
- [3] Blöchl, P. E. *Phys. Rev. B* **1994**, *50*, 17953–17979.
- [4] Perdew, J. P.; Yue, W. *Phys. Rev. B* **1986**, *33*, 8800–8802.
- [5] Zhang, X.; Zhang, Q.; Zhang, Z.; Chen, Y.; Xie, Z.; Wei, J.; Zhou, Z., *Chem. Commun.* **2015**, *51*, 14636-14639.
- [6] Zhang, Z.; Zhang, Q.; Chen, Y.; Bao, J.; Zhou, X.; Xie, Z.; Wei, J.; Zhou, Z., *Angew. Chem. Int. Ed.* **2015**, *54*, 6550-6553.
- [7] Qie, L.; Lin, Y.; Connell, J. W.; Xu, J.; Dai, L., *Angew. Chem. Int. Ed.* **2017**, *56*, 6970-6974.
- [8] Zhang, Z.; Wang, X. G.; Zhang, X.; Xie, Z.; Chen, Y. N.; Ma, L.; Peng, Z.; Zhou, Z., *Adv. Sci.* **2018**, *5*, 1700567.
- [9] Zhang, Z.; Zhang, Z. W.; Liu, P. F.; Xie, Y. P.; Cao, K. Z.; Zhou, Z., *J. Mater. Chem. A* **2018**, *6*, 3218-3223.
- [10] Qiao, Y.; Liu, Y.; Chen, C.; Xie, H.; Yao, Y.; He, S.; Ping, W.; Liu, B.; Hu, L., *Adv. Funct. Mater.* **2018**, *28*, 1805899.
- [11] Wang, C.; Zhang, Q.; Zhang, X.; Wang, X. G.; Xie, Z.; Zhou, Z., *Small* **2018**, *14*, 1800641.
- [12] Xing, Y.; Yang, Y.; Li, D.; Luo, M.; Chen, N.; Ye, Y.; Qian, J.; Li, L.; Yang, D.; Wu, F.; Chen, R.; Guo, S., *Adv. Mater.* **2018**, *30*, 1803124.
- [13] Zhang, X.; Wang, C. Y.; Li, H. H.; Wang, X. G.; Chen, Y. N.; Xie, Z. J.; Zhou, Z., *J. Mater. Chem. A* **2018**, *6*, 2792-2796.
- [14] Ma, W.; Lu, S.; Lei, X.; Liu, X.; Ding, Y., Porous Mn<sub>2</sub>O<sub>3</sub> cathode for highly durable Li–CO<sub>2</sub> batteries. *J. Mater. Chem. A* **2018**, *6*, 20829-20835.
- [15] Li, S. W.; Dong, Y.; Zhou, J. W.; Liu, Y.; Wang, J. M.; Gao, X.; Han, Y. Z.; Qi, P. F.; Wang, B., *Energy Environ. Sci* **2018**, *11*, 1318-1325.
- [16] Hou, Y.; Wang, J.; Liu, L.; Liu, Y.; Chou, S.; Shi, D.; Liu, H.; Wu, Y.; Zhang, W.; Chen, J., *Adv. Funct. Mater.* **2017**, *27*, 1700564.
- [17] Jin, Y.; Hu, C.; Dai, Q.; Xiao, Y.; Lin, Y.; Connell, J. W.; Chen, F.; Dai, L., *Adv.*



Funct. Mater. **2018**, *28*, 1804630.

[18] Zhao, H. M.; Li, D. D.; Li, H. D.; Tamirat, A. G.; Song, X. Y.; Zhang, Z. X.; Wang, Y. G.; Guo, Z. Y.; Wang, L.; Feng, S. H., *Electrochim. Acta* **2019**, *299*, 592-599.

[19] Zhang, P.-F.; Lu, Y.-Q.; Wu, Y.-J.; Yin, Z.-W.; Li, J.-T.; Zhou, Y.; Hong, Y.-H.; Li, Y.-Y.; Huang, L.; Sun, S.-G., *Chem. Eng. J* **2019**, *363*, 224-233.

[20] Qiao, Y.; Xu, S.; Liu, Y.; Dai, J.; Xie, H.; Yao, Y.; Mu, X.; Chen, C.; Kline, D. J.; Hitz, E. M.; Liu, B.; Song, J.; He, P.; Zachariah, M. R.; Hu, L., *Energy Environ. Sci.* **2019**, *12*, 1100-1107.

[21] Guo, Z.; Li, J.; Qi, H.; Sun, X.; Li, H.; Tamirat, A. G.; Liu, J.; Wang, Y.; Wang, L., *Small* **2019**, *15*, 1803246.

[22] Bie, S.; Du, M.; He, W.; Zhang, H.; Yu, Z.; Liu, J.; Liu, M.; Yan, W.; Zhou, L.; Zou, Z., *ACS Appl. Mater. Interfaces* **2019**, *11*, 5146-5151.

[23] Xu, S.-M.; Ren, Z.-C.; Liu, X.; Liang, X.; Wang, K.-X.; Chen, J.-S., *Energy Storage Mater.* **2018**, *15*, 291-298.

[24] Wang, H.; Xie, K.; You, Y.; Hou, Q.; Zhang, K.; Li, N.; Yu, W.; Loh, K. P.; Shen, C.; Wei, B., *Adv. Energy Mater.* **2019**, *9*, 1901806.

[25] Li, Y.; Zhou, J.; Zhang, T.; Wang, T.; Li, X.; Jia, Y.; Cheng, J.; Guan, Q.; Liu, E.; Peng, H.; Wang, B., *Adv. Funct. Mater.* **2019**, *29*, 1808117.

[26] Wang, M.; Yang, K.; Ji, Y.; Liao, X.; Zhang, G.; Masteghin, M. G.; Peng, N.; Richheimer, F.; Li, H.; Wang, J.; Liu, X.; Yang, S.; Petrucco, E.; Shearing, P.; Castro, F. A.; Silva, S. R. P.; Zhao, Y.; Pan, F.; Zhao, Y. *Energy Environ. Sci.* **2023**, *16*, 3960-3967.

[27] Chen, S.; Yang, K.; Zhu, H.; Wang, J.; Gong, Y.; Li, H.; Wang, M.; Zhao, W.; Ji, Y.; Pan, F.; Silva, S. R. P.; Zhao, Y.; Yang, L. *Nano Energy* **2023**, *117*, 108872.

[28] Wang, Z.; Liu, B.; Yang, X.; Zhao, C.; Dong, P.; Li, X.; Zhang, Y.; Doyle-Davis, K.; Zeng, X.; Zhang, Y.; Sun, X. *Adv. Funct. Mater.* **2023**, *33*, 2213931.

[29] Zhu, K.; Li, X.; Choi, J.; Choi, C.; Hong, S.; Tan, X.; Wu, T.-S.; Soo, Y.-L.; Hao, L.; Robertson, A. W.; Jung, Y.; Sun, Z. *Adv. Funct. Mater.* **2023**, *33*, 2213841.

[30] Zhu, Y.; Li, P.; Yang, X.; Wang, M.; Zhang, Y.; Gao, P.; Huang, Q.; Wei, Y.;

- Yang, X.; Wang, D.; Shen, Y.; Wang, M. *Adv. Energy Mater.* **2023**, *13*, 2204143.
- [31] Zhao, W.; Yang, Y.; Deng, Q.; Dai, Q.; Fang, Z.; Fu, X.; Yan, W.; Wu, L.; Zhou, Y. *Adv. Funct. Mater.* **2023**, *33*, 2210037.
- [32] Liu, L.; Shen, S.; Zhao, N.; Zhao, H.; Wang, K.; Cui, X.; Wen, B.; Wang, J.; Xiao, C.; Hu, X.; Su, Y.; Ding, S. *Adv. Mater.* **2024**, 2403229. DOI: 10.1002/adma.202403229.
- [33] Mao, R.; Liu, Y.; Shu, P.; Lu, B.; Chen, B.; Chen, Y.; Song, Y.; Jia, Y.; Zheng, Z.; Peng, Q.; Zhou, G. *EcoMat* **2024**, e12449. DOI: 10.1002/eom2.12449.
